# Supplementary material
Source: publisher site journal article supplement (https://www.spandidos-publications.com/3639/downloadSupplementary)

Figure S1. (A) The transfection efficiency of pre-miRNA-335. (B) The transfection efficiency of anti-miRNA-335. \* $P < 0.05$  vs. the Sham group;  $n = 5$ . miRNA/miR, micro RNA; NC, negative control.

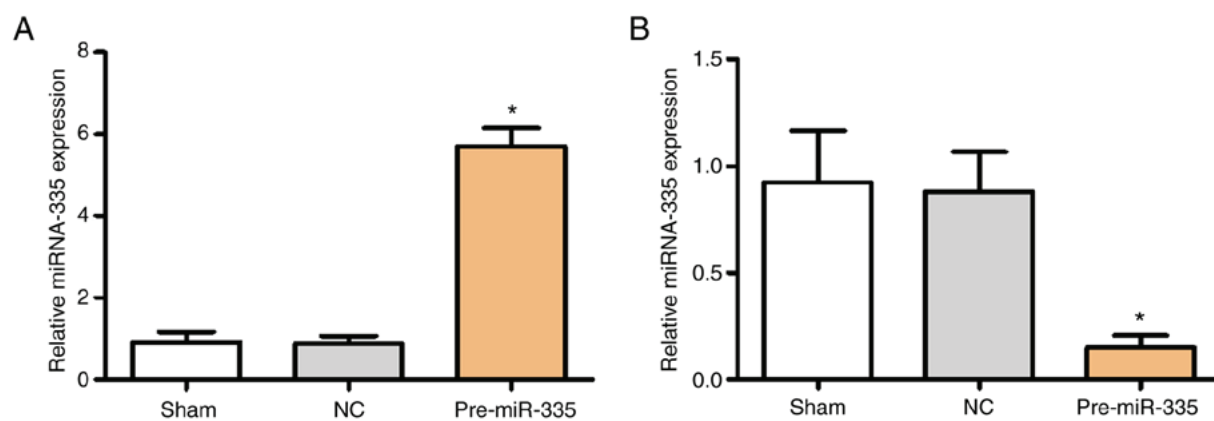

Figure S2. The expressions of miR-335 at 12, 24, 48, 72 h. \*P<0.05 vs. CLP. n=5. miRNA/miR, micro RNA; CLP, cecal ligation and puncture.

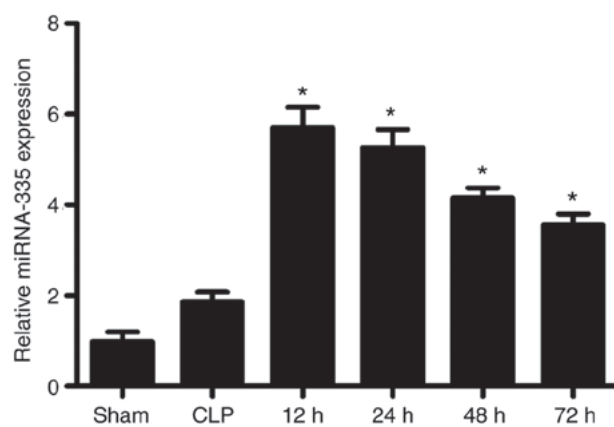

Supplement: Supplementary file 1 [file downloadSupplementary]
